# Supplementary material
Source: publisher site journal article supplement (https://www.dovepress.com/article/485159)

**Figure S1:** **Protein Structure of Pro-Inflammatory Transcription Factors Activated by Chronic Stress.**

**
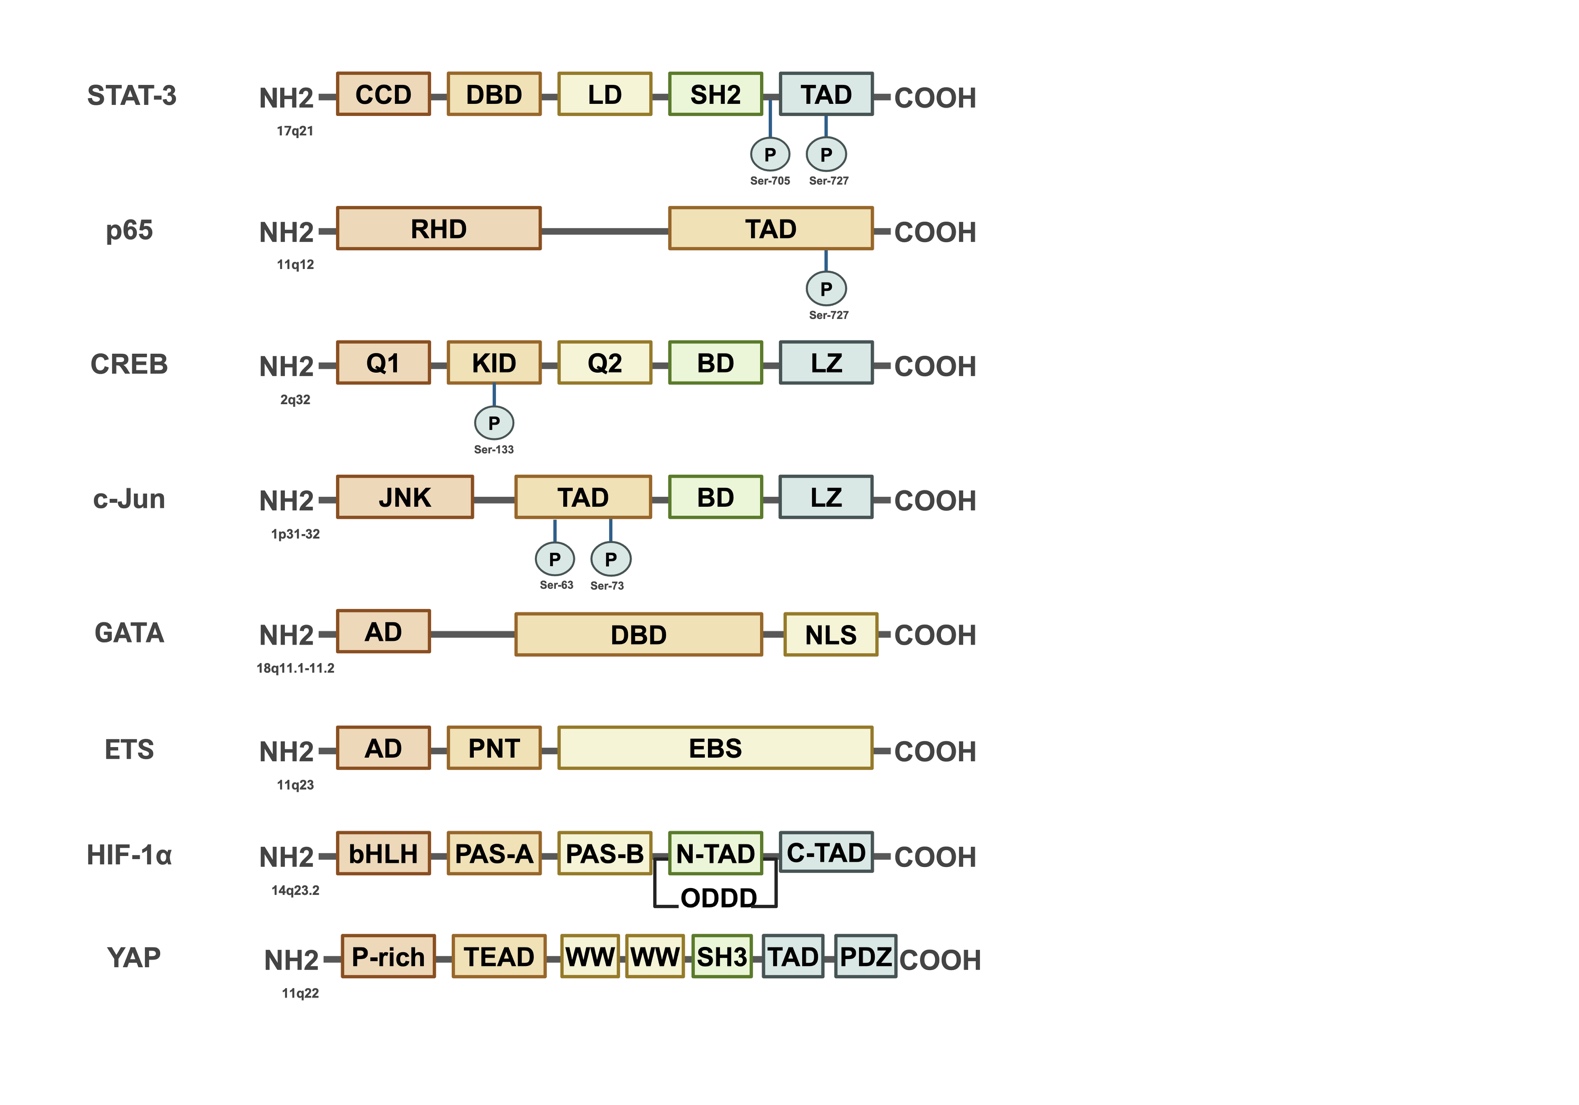
**

**Figure S2: The positive feedback loop of L-6-STAT-3 and TNF-α-NF-κB mediated by chronic inflammation promotes the occurrence and progression of cancer.**


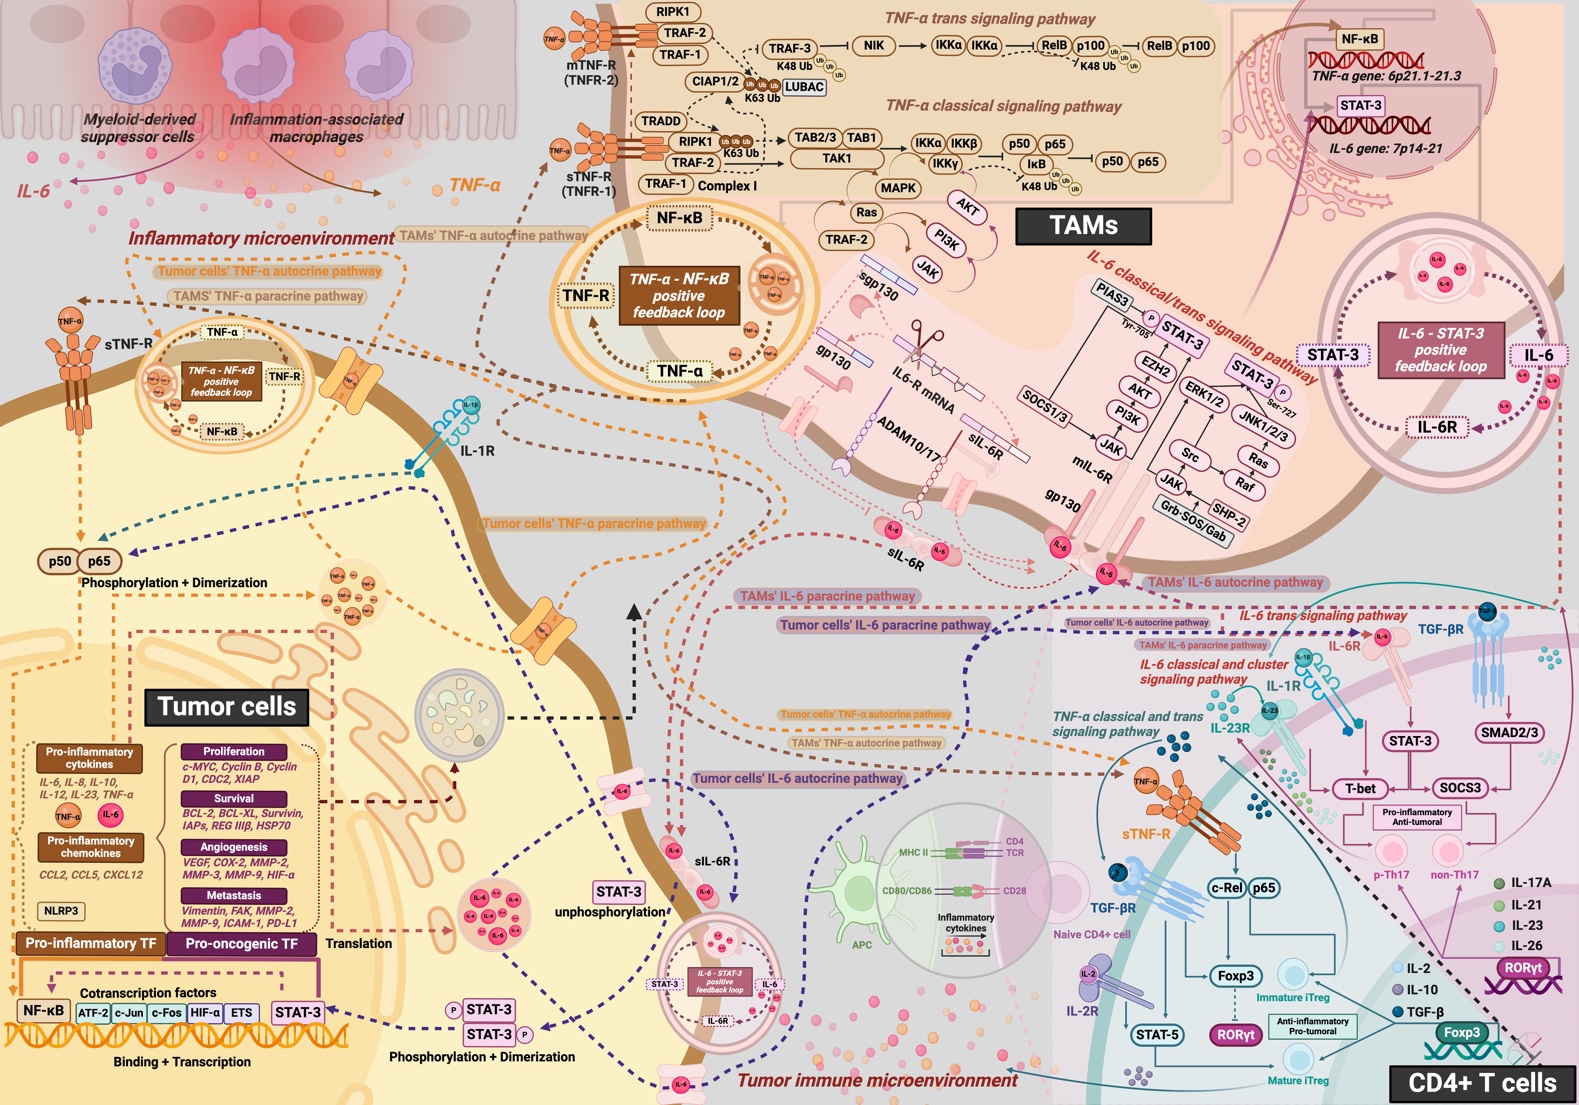

Supplement: Supplementary file 1 [file get_supplementary_file.php]
